# Supplementary material for: Laser-induced nitrogen fixation
Source: PubMed Central journal article supplement (PMC10499830; doi:10.1038/s41467-023-41441-0), 2023-09-13
Supplement: 41467_2023_41441_MOESM3_ESM.pdf [file 41467_2023_41441_MOESM3_ESM.pdf]

### **Description of Additional Supplementary Files**

**Supplementary Movie 1:** LINF process of lithium oxide under nitrogen

**Supplementary Movie 2:** LINF process of lithium oxide under argon.

**Supplementary Movie 3:** LINF process of Magnesium oxide under nitrogen
